# Supplementary material for: Comparison of Multiple Bioactive Constituents in Different Parts of Eucommia ulmoides Based on UFLC-QTRAP-MS/MS Combined with PCA
Source: MDPI journal article supplement (doi:10.3390/molecules23030643), 2018-03-13
Supplement: s1 [file s1]

## Supplementary Material

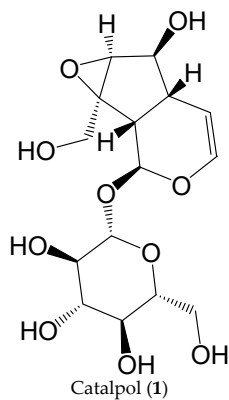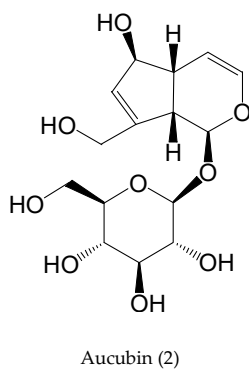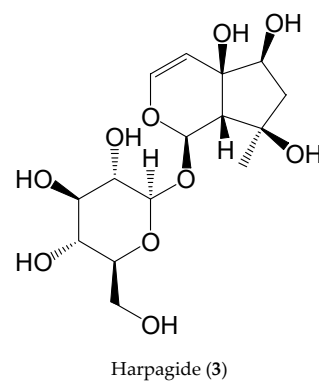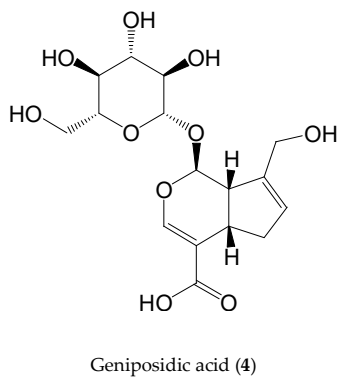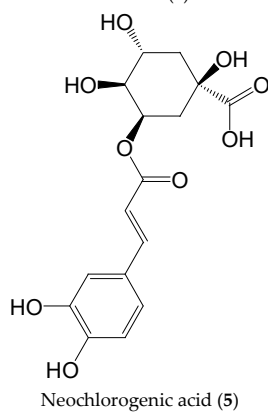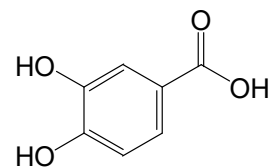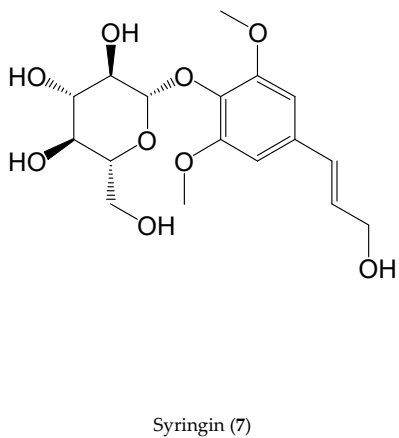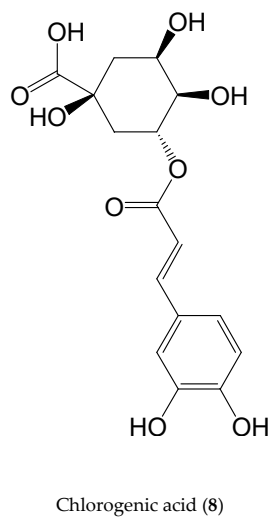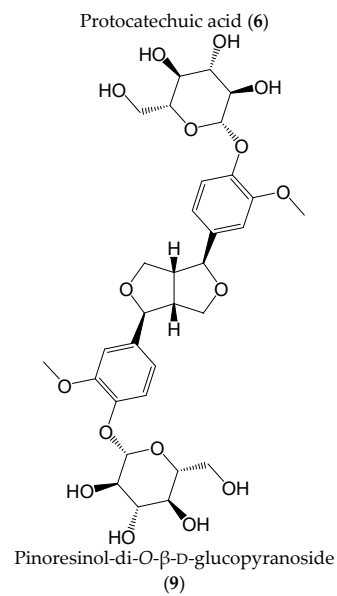

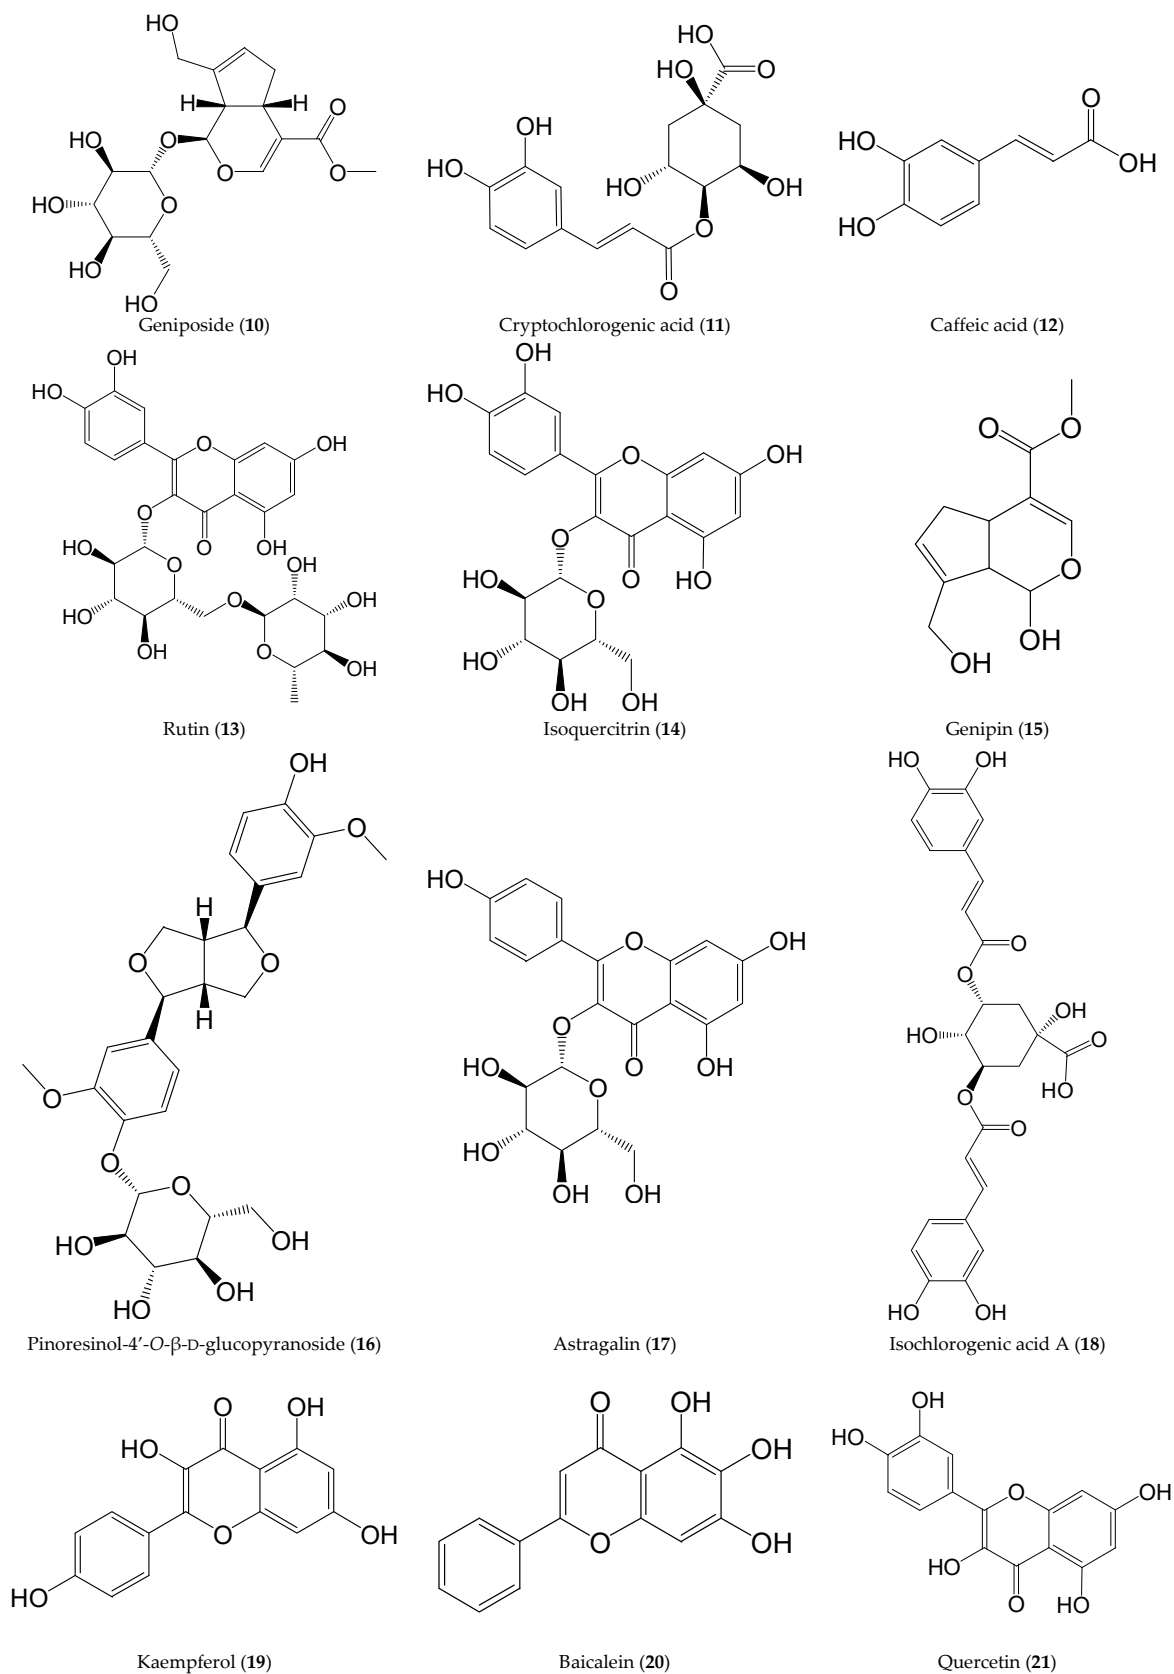

**Figure S1.** Chemical structures of 21 reference substances.

**Table S1.** The data matrix applying PCA

| No. | S1         | S2        | S3       | S4         | S5         | S6        | S7        | S8        | S9        |
|-----|------------|-----------|----------|------------|------------|-----------|-----------|-----------|-----------|
| 1   | -17.3719   | -29.2485  | -24.8985 | 11.0848    | 47.6348    | 91.4682   | -24.8985  | -27.8052  | -25.9652  |
| 2   | -650.861   | -445.194  | -107.194 | -974.494   | -956.844   | -984.494  | -918.194  | 1376.14   | 3661.14   |
| 3   | 0.736815   | -0.789519 | 1.45848  | -0.0598519 | 0.370148   | -0.551519 | 0.636815  | -0.396519 | -1.40485  |
| 4   | 106.241    | -517.092  | -1130.09 | -1394.59   | -1491.54   | -1456.65  | 1761.24   | 2017.91   | 2104.57   |
| 5   | -17.7685   | -27.1019  | -38.0852 | 90.1148    | 34.5148    | 18.0482   | -20.3485  | -20.3019  | -19.0719  |
| 6   | -50.7337   | -59.747   | -56.2837 | -21.3504   | 198.2      | 88.5663   | -27.3337  | -32.817   | -38.5004  |
| 7   | -13.9817   | -11.2467  | -8.33667 | 22.055     | -14.0067   | -8.68833  | 8.65167   | 13.135    | 12.4183   |
| 8   | -2718.67   | -6472     | -9107.33 | 3338       | 1698       | 844.666   | 2661.33   | 3794.67   | 5961.33   |
| 9   | 502.445    | 909.112   | 739.112  | -376.822   | -369.975   | -364.172  | -369.005  | -358.972  | -311.722  |
| 10  | -307.056   | -89.4056  | -172.606 | -320.739   | -320.739   | -320.739  | -208.906  | 257.594   | 1482.59   |
| 11  | -679.185   | -1619.19  | -2286.52 | 860.815    | 407.482    | 270.815   | 650.815   | 857.482   | 1537.48   |
| 12  | -15.7878   | -27.9344  | -32.6511 | -18.0544   | 135.396    | -9.07111  | 4.17889   | -9.58778  | -26.4878  |
| 13  | -747.63    | -747.63   | -747.63  | -206.63    | -658.963   | -404.63   | 1814.04   | 761.704   | 937.37    |
| 14  | -255.148   | -255.148  | -255.148 | 219.852    | -146.815   | 114.519   | 140.185   | 185.852   | 251.852   |
| 15  | -73.2702   | 9.37982   | 20.8798  | -71.9535   | -81.6052   | -68.2369  | 324.046   | -47.0702  | -12.1702  |
| 16  | 60.5952    | 124.262   | 228.762  | -70.4381   | -75.4581   | -71.5448  | -65.2515  | -66.5215  | -64.4048  |
| 17  | -79.4722   | -79.4722  | -79.4722 | 86.0278    | -31.8222   | 81.2611   | 27.0611   | 36.8611   | 39.0278   |
| 18  | -5.79074   | -43.5574  | -58.9407 | 11.3759    | -94.8907   | -72.7241  | -10.7907  | -22.1241  | 297.443   |
| 19  | -11.6278   | -11.6278  | -11.6278 | 10.5056    | 19.4556    | 8.43889   | 7.68889   | -5.63444  | -5.57111  |
| 20  | -0.0319593 | 0.530207  | 0.116374 | -0.0806259 | -0.0940926 | -0.105126 | -0.108126 | -0.122026 | -0.104626 |
| 21  | -997.111   | -997.111  | -997.111 | 2743.56    | 1087.89    | 654.556   | -288.778  | -359.278  | -846.611  |

**Table S2.** The p1 and p2 values of the points in PCA loading plot

| No. | p1         | p2         |
|-----|------------|------------|
| 1   | 0.00114    | -0.0146    |
| 2   | 0.126      | 0.561      |
| 3   | -0.0000861 | -0.0000922 |
| 4   | 0.150      | 0.569      |
| 5   | 0.00287    | -0.0162    |
| 6   | 0.00368    | -0.0246    |
| 7   | 0.00177    | 0.000590   |
| 8   | 0.933      | -0.133     |
| 9   | -0.0920    | 0.0740     |
| 10  | 0.0521     | 0.198      |
| 11  | 0.234      | -0.0383    |
| 12  | 0.00197    | -0.0111    |
| 13  | 0.119      | 0.183      |
| 14  | 0.0363     | 0.00100    |
| 15  | 0.00112    | 0.0168     |
| 16  | -0.0193    | 0.0150     |
| 17  | 0.00997    | -0.00939   |
| 18  | 0.0114     | 0.0317     |
| 19  | 0.00108    | -0.00403   |
| 20  | -0.0000285 | 0.0000169  |
| 21  | 0.0935     | -0.512     |
